# Supplementary material for: The Property Rights Index in Forestry (PRIF): a new governance indicator with predictive capacity for forest status and dynamic across Europe
Source: Research Square preprint supplement (doi:10.21203/rs.3.rs-7683489/v1), 2025-10-30
Supplement: Supplementary file 1 [file c8edd54980df7668bd089135.docx]

**The Property Rights Index in Forestry (PRIF): a new governance indicator with predictive capacity for forest status and dynamic across Europe**

**Authors:**

Richard Rimoli*a – richard.rimoli@gmail.com, Jean-Daniel Bontempsb, Laura Bouriauda, Aditya Acharyac, Alexandre Nolletd, Bilal Snoussid, Lison Ambroised, Louis Cordonniere, Liviu Nichiforela.

aUniversitatea Stefan cel Mare, Suceava, Romania

b IGN – ENSG - Laboratoire d'inventaire Forestier, Nancy, France

cPolcom Research and Consultancy services, Kathmandu, Nepal

dAgroParisTech, Nancy, France

eUniversité Catholique de Louvain, Louvain-la-Neuve, Belgium

# Supplementary Information

## Annex 1

SES indicator sources.

| Data/Year | Source | Data relative to year |
| --- | --- | --- |
| Relative forest cover | Forests resource assessment 2020 database (modified) | 2015 |
| Reforestation 2010-2015 | Forests resource assessment 2020 database | 2010-2015 |
| Naturally regenerated forest (%) | Forests resource assessment 2020 database | 2010-2015 |
| Planted forest (%) | Forests resource assessment 2020 database | 2010-2015 |
| Relative annual forest expansion 2010-2015 | Forests resource assessment 2020 database | 2010-2015 |
| ...of which afforestation | Forests resource assessment 2020 database (modified) | 2010-2015 |
| ...of which natural expansion | Forests resource assessment 2020 database (modified) | 2010-2015 |
| Deforestation 2010-2015 (%/year) | Forests resource assessment 2020 database | 2010-2015 |
| Forest area net change 2010-2015 | Forests resource assessment 2020 database (modified) | 2010-2015 |
| Rate of forest area designated to protection of soil and water management | Forests resource assessment 2020 database (modified) | 2015 |
| Rate of forest area designated to conservation management | Forests resource assessment 2020 database (modified) | 2015 |
| Rate of protected area relative to forest cover | Forests resource assessment 2020 database (modified) | 2015 |
| Rate of forest with a long-term management plan | Forests resource assessment 2020 database (modified) | 2015 |
| Rate of forest area only used for production | Forests resource assessment 2020 database(modified) | 2015 |
| Rate of Gross Value-Added form forestry to GDP | Forests resource assessment 2020 database (modified) | 2015 |
| Gross Value-Added form forestry per 1000ha production managed Forest | Forests resource assessment 2020 database (modified) | 2015 |
| Gross Value-Added form forestry per 1000ha of forest cover | Forests resource assessment 2020 database (modified) | 2015 |
| Employment in forestry and logging/production area | Forests resource assessment 2020 database (modified) | 2015 |
| Average forest density m³/1000ha | Forests resource assessment 2020 database | 2015 |
| Forest GS (million m³ over bark/1000ha) | Forests resource assessment 2020 database | 2015 |
| Naturally regenerating forest (million m³ over bark/1000ha) | Forests resource assessment 2020 database | 2015 |
| Planted forest GS (million m³ over bark/1000ha) 2015 | Forests resource assessment 2020 database | 2015 |
| Felling to increment rate 1990 | State of European forests 2020 database | 1990 |
| Felling to increment rate 2000 | State of European forests 2020 database | 2000 |
| Felling to increment rate 2010 | State of European forests 2020 database | 2010 |
| Felling to increment rate 2015 | State of European forests 2020 database | 2015 |
| Average annual change in growing stock 2005-2015 | State of European forests 2020 database | 2005-2015 |
| Rate of public forest ownership | Forests resource assessment 2020 database | 2015 |
| Rate of private forest ownership | Forests resource assessment 2020 database | 2015 |
| Unknown/other ownership | Forests resource assessment 2020 database | 2015 |

## Annex 2

### International Property Rights Index

The measure of property rights is key to understanding how said rights affect landowners’ behaviour. Property rights can have a direct impact on environmental conservation (Boudreaux & Nelson, 2011; A. Li et al., 2018; Norton-Griffiths, 1996; Rissman, 2013; Moon et al., 2021; Angelsen, 2009; Bouriaud & Schmithüsen, 2005) or influence investments made in the land (Ren et al., 2018; Takacs, 2009; Yi et al., 2014), which can also result in unwanted results, such as deforestation (Amacher et al., 2009; Liscow, 2013). To describe and compare property rights, and understand their social, economic or environmental impacts the *International Property Rights Index* (IPRI) was developed by the Property Rights Alliance (2022) and is based on three core components: legal and political environment (LP), physical property rights (PPR), and intellectual property rights (IPR) (Levy-Carciente, 2022).

### Rule of law index (RLI)

The rule of law is a durable system of laws, institutions, and community commitment that grants four universal principles: accountability, just laws, open government, acceptable and impartial dispute resolution. The World Justice Project NGO *Rule of Law Index* measures how the rule of law is experienced and perceived by societies based on expert surveys (WJP Rule of Law Index, 2023).

### Corruption Perception Index (CPI)

Each year, the *Transparency International* NGO publishes the *Corruption Perception Index* (CPI) aiming to quantify the perceived corruption in the public sector of each country, from both private and public stakeholders’ perspective. The index elaboration follows a four-step methodology : 1) The data source must fulfil certain criteria, such as quantifying perception of corruption in the public sector, scores and rankings on the same scale, data must be collected by a trustworthy institution and allow for sufficient variation to distinguish between countries; 2) The is standardised on a scale from 0 to 100, where 0 is equivalent to the highest perception of corruption and 100 the lowest; 3) A minimum of 3 sources must be used to include the country in the CPI, the result being an arithmetic mean of all the sources. These values are then rounded to whole numbers; 4) There must be a report of the standard error and confidence interval associated with the score (Transparency International, 2023). High CPI scores indicate lower perceived corruption.

### Human Development Index (HDI)

The *Human Development Index* is calculated by the UN Development Programme(United Nations, 2023) and is a synthetic measure of the average achievement in key dimensions of human development: long and healthy life (Life expectancy at birth), education (expected years of schooling and mean years of schooling) and having a decent standard of living (GDP per capita). The Index is the geometric mean of normalized indices for each of the three values and does not reflect inequalities, poverty, human security, empowerment, etc. According to the UNDP, the sources of data used are major databases of income/consumption and years of schooling that contain micro data from national household surveys, harmonized with common international standards (United Nations, 2023).

### Index of Economic Freedom (IEF***)***

The Heritage NGO, responsible for the calculation of the *Index of Economic Freedom*, defines economic freedom as “the fundamental right of every human to control his or her own labour and property. In an economically free society, individuals are free to work, produce, consume, and invest in any way they please” (Heritage Foundation, n.d.). Economic freedom is measured from 12 quantitative factors, grouped in 4 main categories: Rule of law (property rights, judicial effectiveness, government integrity); government size (tax burden, government spending, fiscal health); regulatory efficiency (business freedom, labour freedom, monetary freedom) and open market (trade, investment, and financial freedom) (Kim et al., 2023).

### Environmental Performance Index (EPI)

The EPI(Yale Centre for Environmental Law & Policy, 2023) ranks countries’ performance in the protection of human and ecosystems health. The EPI framework organises forty indicators into 11 issue categories and 3 policy objectives (Environmental Health, Climate and Ecosystem Vitality).

The transformation of raw datasets into comparable performance indicators is performed by standardization according to population, land area, gross domestic product, and other units of measure. Standardized data from the 40 sustainability indicators are a weighted aggregation, using a distance-to-target approach, yielding a single score on the environmental performance of each of the 180 countries analysed (Wolf et al., 2022).

Alongside the aggregate EPI value, the scores for “Tree cover loss” (EPI_ECO_tcl), “Climate change policy objective” (EPI_CCP) and “ecosystem services” (EPI_ ECO) issues will also be used to compare their specific correlation with the PRIF and its categories in view of their specific relevance.

The “climate change policy objective” comprises 38% of EPI scores and is a measure of mitigation actions. These actions are measured using GHG emissions and projections. Ecosystem services’ scores are calculated using three other sub-indicators, tree cover, wetland, and grassland loss.

Meanwhile, tree cover loss scores vary from 0 to 100, 100 indicating that there was no forest cover loss registered. The calculation method consists of the average annual loss in forest area in the past five years, divided by forest cover in the year of 2000.
